# Supplementary material for: Production of Therapeutically Significant Genistein and Daidzein Compounds from Soybean Glycosides Using Magnetic Nanocatalyst: A Novel Approach
Source: MDPI journal article supplement (doi:10.3390/catal12101107), 2022-09-25
Supplement: s1 [file s1]

**Production of pharmaceutical aglycone compounds from plant-based glycosides using acid-functionalized magnetic nanocatalyst: a sustainable approach**

**Mamata Singhvi, Minseong Kim, Beom Soo Kim\***

**\*Department of Chemical Engineering, Chungbuk National University, Cheongju, Chungbuk 28644, Republic of Korea**

**Corresponding Author\*:**

**Beom Soo Kim**

**Department of Chemical Engineering,**

**Chungbuk National University,**

**Cheongju, Chungbuk 28644,**

**Republic of Korea.**

**Tel.: +82 43 261 2372; Fax: +82 43 269 2370;**

**e-mail: [bskim@chungbuk.ac.kr](mailto:bskim@chungbuk.ac.kr)**

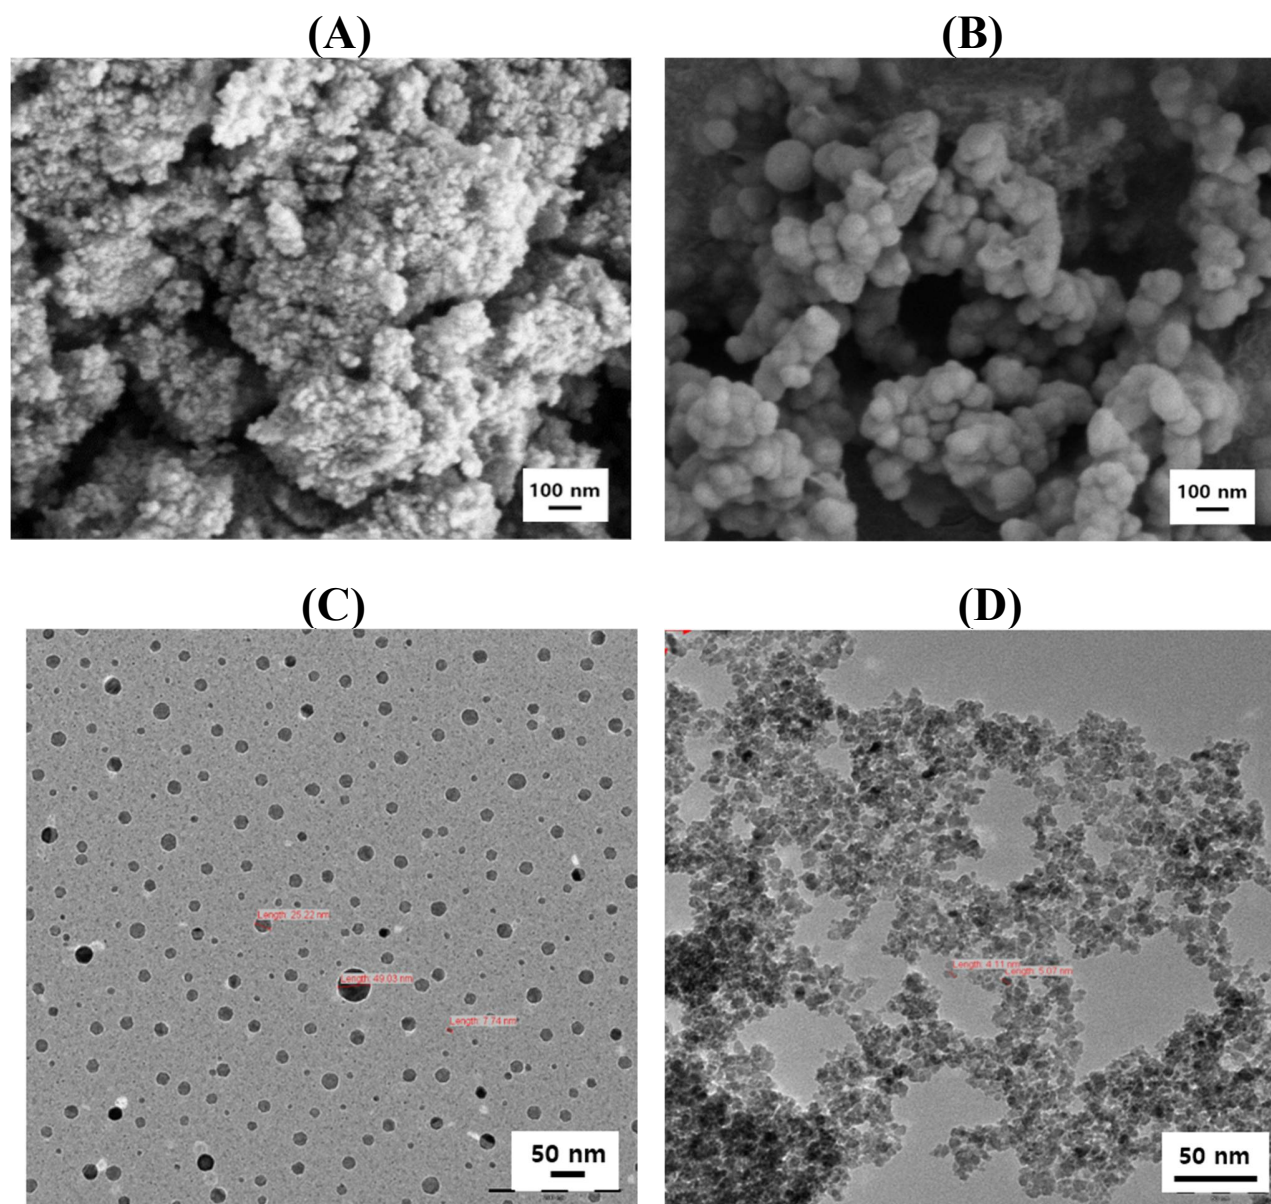

**Figure S1.** SEM (A and B) and TEM (C and D) analysis of CoFe<sub>2</sub>O<sub>4</sub> and CoFe<sub>2</sub>O<sub>4</sub>-Si nanocatalyst, respectively.

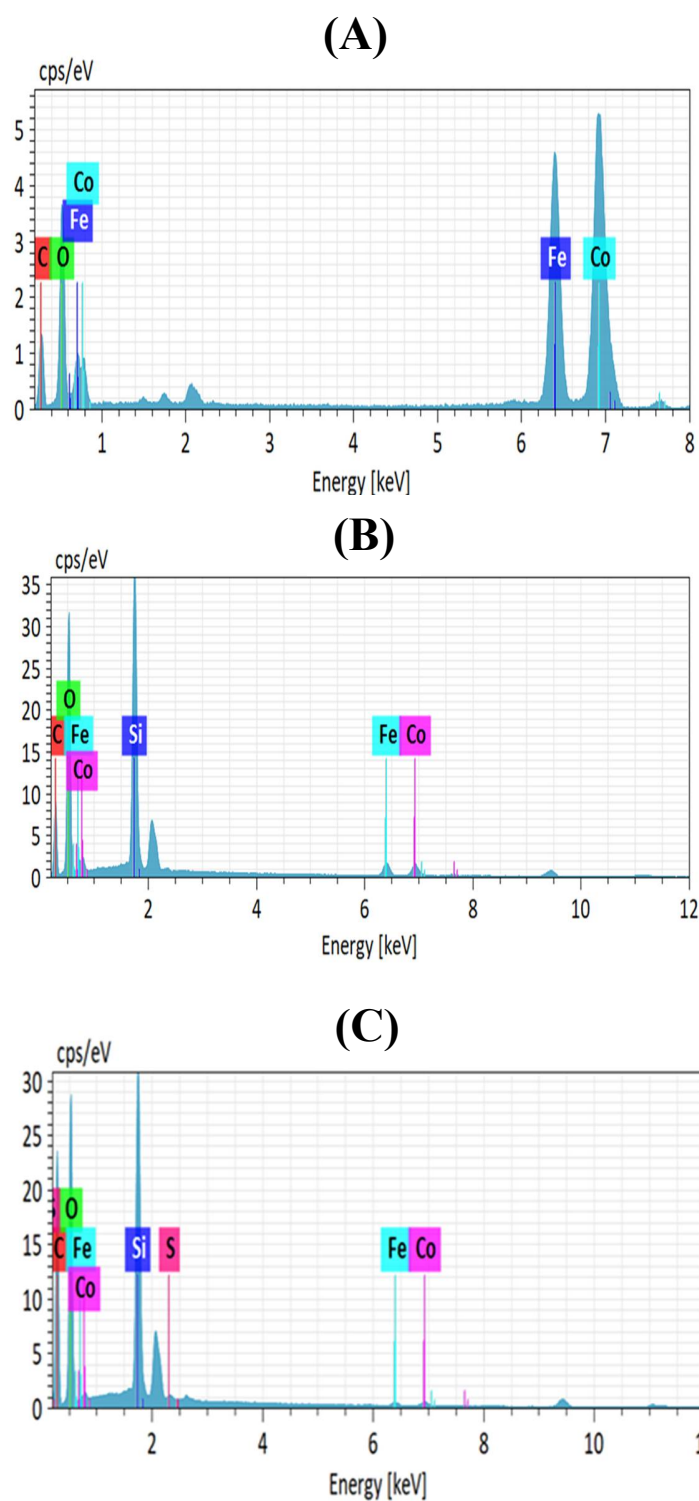

**Figure S2.** EDX analysis of the synthesized nanoparticles: (A)  $\text{CoFe}_2\text{O}_4$ , (B)  $\text{CoFe}_2\text{O}_4\text{-Si}$ , and (C)  $\text{CoFe}_2\text{O}_4\text{-Si-ASA}$ .

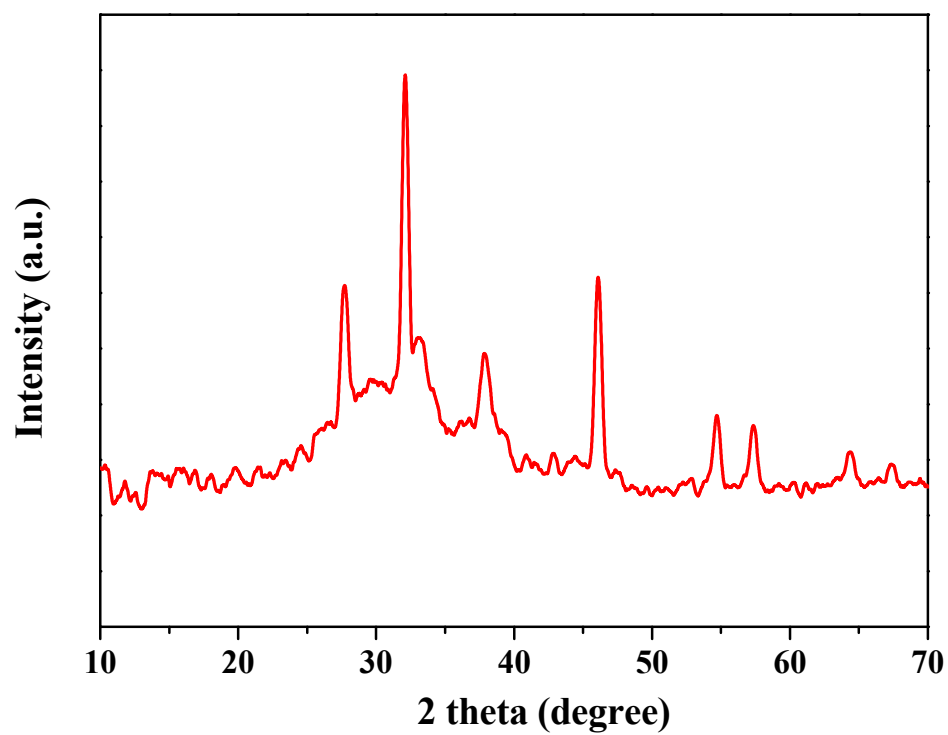

**Figure S3.** XRD analysis of the synthesized nanocatalyst,  $\text{CoFe}_2\text{O}_4\text{-Si-ASA}$ .

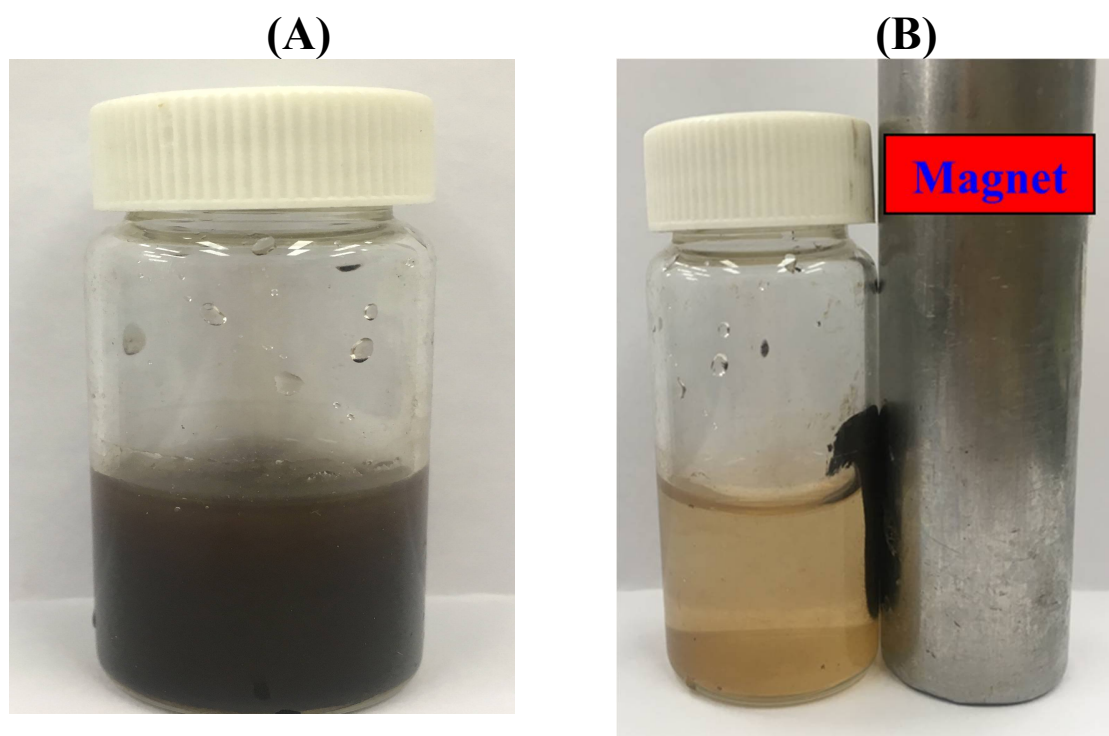

**Figure S4.**  $\text{CoFe}_2\text{O}_4$  MNPs showing magnetic property.
